# Supplementary material for: Polycistronic gene expression in Aspergillus niger
Source: PubMed Central journal article supplement (PMC5613464; doi:10.1186/s12934-017-0780-z), 2017-09-25
Supplement: 12934_2017_780_MOESM1_ESM.pdf [file 12934_2017_780_MOESM1_ESM.pdf]

# 1 Primers and Plasmids

Table 1: Primers used in this study, linker sequences are indicated in lower case

| Primer name | Primer sequence                                   |
|-------------|---------------------------------------------------|
| 255         | TGCTTAATCAGTGAGGCACC                              |
| 432         | AGTAGATGCCGACCGGGA                                |
| 560         | ccggtcggcatctactgtttaaacttaGAGCTTGGACTTGCCGCCCT   |
| 632         | GGCTCCGGCGCCACCAACTTCTCCCTCCTGAAGCAGGCCGGTGAC     |
| 633         | GGGGCCGGGTTCTCCTCGACGTCACCGGCCTGCTTCAGGAGGGA      |
| 635         | ATGAAAAGCCTGTGGCCTCA                              |
| 636         | TAATGTCCTCCTAGCCAATCATCC                          |
| 637         | ATGTCACTCCACACCCCAAG                              |
| 638         | CAAAGCCTCGTTCAAACCATTG                            |
| 639         | ATGGAGGACGCCAAGAACA                               |
| 640         | GAGCTTGGACTTGCCGCC                                |
| 641         | ggcggcaagtccaagctcGGCTCCGGCGCCACC                 |
| 642         | gttcttggtcctccatGGGGCCGGGTTCTCC                   |
| 643         | ttgctagaggacattaGGCTCCGGCGCCACC                   |
| 644         | ggccacaggctttccatGGGGCCGGGTTCTCC                  |
| 645         | ggccacaggctttccatGGCGCCGGGTTCTCC                  |
| 646         | ggttgaacgaggcttgGGCTCCGGCGCCACC                   |
| 647         | tgggtgtggagtacatGGGGCCGGGTTCTCC                   |
| 648         | tgggtgtggagtacatGGCGCCGGGTTCTCC                   |
| 649         | ttgagcagacatcaccgtttaaaccaccATGAAAAGCCTGTGGCCTCA  |
| 652         | ccggtcggcatctactgtttaaacttaCAAAGCCTCGTTCAAACCATTG |
| 720         | tgaggtttgaacaaGGATGAGTTGGCTAGGAGGAC               |
| 762         | cgcaggttgatctgctggaAATCAAGAGGACTAACC              |
| 763         | GGTAGTTAGTCTCTTGATTTCCAG                          |
| 764         | cagatcgctgagataGGTGCCTCACTGATTAAGCA               |
| 778         | TACAGCTGCGTTTGCG                                  |
| 779         | CATCGACAAGGACGGC                                  |

Table 2: Plasmids used in this study, \* refers to a mutated P2A

| Plasmid name | Description                                                       | Reference                  |
|--------------|-------------------------------------------------------------------|----------------------------|
| pXM1.1       | $P_{gpdA}::rtTA2^S-M2::T_{cgrA}::tetO7::P_{min}::luc::T_{trpC}$   | Wanka <i>et al.</i> 2016   |
| pÖV7.3       | $P_{gpdA}::rtTA2^S-M2::T_{cgrA}::tetO7::P_{min}::ekivR::T_{trpC}$ | not published              |
| pDS4.2       | $P_{gpdA}::rtTA2^S-M2::T_{cgrA}::tetO7::P_{min}::esyn1::T_{trpC}$ | Richter <i>et al.</i> 2014 |
| pVG2.2       | $P_{gpdA}::rtTA2^S-M2::T_{cgrA}::tetO7::P_{min}::T_{trpC}$        | Meyer <i>et al.</i> 2011   |
| pTS32.372    | pVG2.2 with <i>luc-P2A-ekivR-P2A-esyn1</i>                        | this study                 |
| pTS35.41     | pVG2.2 with <i>luc-P2A-ekivR</i>                                  | this study                 |
| pTS36.6      | pVG2.2 with <i>luc-P2A*-ekivR-P2A*-esyn1</i>                      | this study                 |
| pTS37.13     | pVG2.2 with <i>ekivR-P2A-luc-P2A-esyn1</i>                        | this study                 |
| pTS38.3      | pVG2.2 with <i>ekivR-P2A-esyn1-P2A-luc</i>                        | this study                 |

## 2 Plasmid assembly

The P2A peptide was generated by fusing primer 632 and 633.

P2A sequence: GGCTCCGGCGCCACCAACTTCTCCCTCCTGAAGCAGGCCGGTGACGTCGAGGAGAAC-CCCGGCCCC. The corresponding overlapping base pairs needed for Gibson assembly were introduced by primers. All PCRs for the genes and P2A fragments with the corresponding linkers are shown in Table 3.

All genes were expressed from the Tet-On system. The plasmid pVG2.2 linearised with PmeI was used as

a backbone. Assembly of a plasmid containing the *esyn1* gene when building pTS32.\* failed. Therefore, the *esyn1* gene was divided in two fragments.

Table 3: PCR reactions for building blocks

| PCR # | Primer pair used | 5' overlap   | 3' overlap   | Template for PCR | Short description                                                |
|-------|------------------|--------------|--------------|------------------|------------------------------------------------------------------|
| 1     | 635&636          |              |              | pÖV7.3           | <i>ekivR</i> ORF no stop                                         |
| 2     | 637&638          |              |              | pDS4.2           | <i>esyn1</i> ORF no stop                                         |
| 3     | 639&640          |              |              | pXM1.1           | <i>luc</i> ORF no stop                                           |
| 4     | 641&644          | <i>luc</i>   | <i>ekivR</i> | P2A              | functional P2A with overlap to <i>luc</i> and <i>ekivR</i>       |
| 5     | 643&647          | <i>ekivR</i> | <i>esyn1</i> | P2A              | functional P2A with overlap to <i>ekivR</i> and <i>esyn1</i>     |
| 6     | 641&645          | <i>luc</i>   | <i>ekivR</i> | P2A              | non-functional P2A with overlap to <i>luc</i> and <i>ekivR</i>   |
| 7     | 635&648          | <i>ekivR</i> | <i>esyn1</i> | P2A              | non-functional P2A with overlap to <i>ekivR</i> and <i>esyn1</i> |
| 8     | 641&647          | <i>luc</i>   | <i>esyn1</i> | P2A              | functional P2A with overlap to <i>luc</i> and <i>esyn1</i>       |
| 9     | 646&644          | <i>esyn1</i> | <i>ekivR</i> | P2A              | functional P2A with overlap to <i>esyn1</i> and <i>ekivR</i>     |
| 10    | 643&642          | <i>ekivR</i> | <i>luc</i>   | P2A              | functional P2A with overlap to <i>ekivR</i> and <i>luc</i>       |
| 11    | 646&642          | <i>esyn1</i> | <i>luc</i>   | P2A              | functional P2A with overlap to <i>esyn1</i> and <i>luc</i>       |
| 12    | 764&640          | <i>ampR</i>  |              | pTS35.41         | fragment from <i>ampR</i> to <i>luc</i> including Tet-On         |

Table 4: Assembly of pTS32.372

| PCR # | Primer pair used | 5' overlap               | 3' overlap               | Template for PCR        | Short description                                                             |
|-------|------------------|--------------------------|--------------------------|-------------------------|-------------------------------------------------------------------------------|
| 13    | 432&255          | T <sub><i>trpC</i></sub> | <i>ampR</i>              | pVG2.2                  | fragment from T <sub><i>trpC</i></sub> to <i>ampR</i> including <i>pyrG</i> * |
| 14    | 764&636          | <i>ampR</i>              | <i>ekivR</i>             | pTS35.41                | fragment from <i>ampR</i> to <i>ekivR</i> , including Tet-On, <i>luc</i>      |
| 15    | 720&763          | <i>ekivR</i>             | <i>esyn1</i> /2          | fusion of #5 and pDS4.2 | first half of <i>esyn1</i>                                                    |
| 16    | 762&652          | <i>esyn1</i> /2          | T <sub><i>trpC</i></sub> | pDS4.2                  | second half <i>esyn1</i>                                                      |

Table 5: Assembly of pTS36.6

| PCR # | Primer pair used | 5' overlap               | 3' overlap                                 | Template for PCR      | Short description                                                             |
|-------|------------------|--------------------------|--------------------------------------------|-----------------------|-------------------------------------------------------------------------------|
| 17    | 432&255          | T <sub><i>trpC</i></sub> | <i>ampR</i>                                | pVG2.2                | fragment from T <sub><i>trpC</i></sub> to <i>ampR</i> including <i>pyrG</i> * |
| 18    | 764&645          | <i>ampR</i>              | <i>ekivR</i>                               | fusion of #12 and #6  | fragment from <i>ampR</i> to <i>luc</i> including Tet-On                      |
| 19    | 635&763          | <i>ekivR</i>             | <i>esyn1</i> /2<br>with non-functional P2A | fusion of #6 & pDS4.2 | fragment from <i>ekivR</i> to half <i>esyn1</i>                               |
| 20    | 762&652          | <i>esyn1</i> /2          | T <sub><i>trpC</i></sub>                   | pDS4.2                | second half of <i>esyn1</i>                                                   |

Table 6: Assembly of pTS37.13

| PCR # | Primer pair used | 5' overlap               | 3' overlap               | Template for PCR | Short description                                                             |
|-------|------------------|--------------------------|--------------------------|------------------|-------------------------------------------------------------------------------|
| 21    | 432&255          | T <sub><i>trpC</i></sub> | <i>ampR</i>              | pVG2.2           | fragment from T <sub><i>trpC</i></sub> to <i>ampR</i> including <i>pyrG</i> * |
| 22    | 764&642          | <i>ampR</i>              | <i>luc</i>               | pTS38.3          | fragment from <i>ampR</i> to <i>ekivR</i>                                     |
| 23    | 639&647          | <i>luc</i>               | <i>esyn</i>              | pTS35.41         | <i>luc</i> gene with linkers                                                  |
| 24    | 637&763          | <i>esyn</i>              | <i>esyn1</i> /2          | pDS4.2           | first half of <i>esyn1</i>                                                    |
| 25    | 762&652          | <i>esyn1</i> /2          | T <sub><i>trpC</i></sub> | pDS4.2           | second half of <i>esyn1</i>                                                   |

Table 7: Assembly of pTS38.3

| PCR # | Primer pair used | 5' overlap              | 3' overlap               | Template for PCR     | Short description            |
|-------|------------------|-------------------------|--------------------------|----------------------|------------------------------|
| 26    | 649&763          | P <sub><i>min</i></sub> | <i>esyn1</i> /2          | pTS32.372            | first half of <i>esyn1</i>   |
| 27    | 762&642          | <i>esyn1</i> /2         | <i>luc</i>               | fusion of #2 and #11 | second half of <i>esyn1</i>  |
| 28    | 639&560          | <i>luc</i>              | T <sub><i>trpC</i></sub> | pXM1.1               | <i>luc</i> gene with linkers |

### 3 Plasmid maps

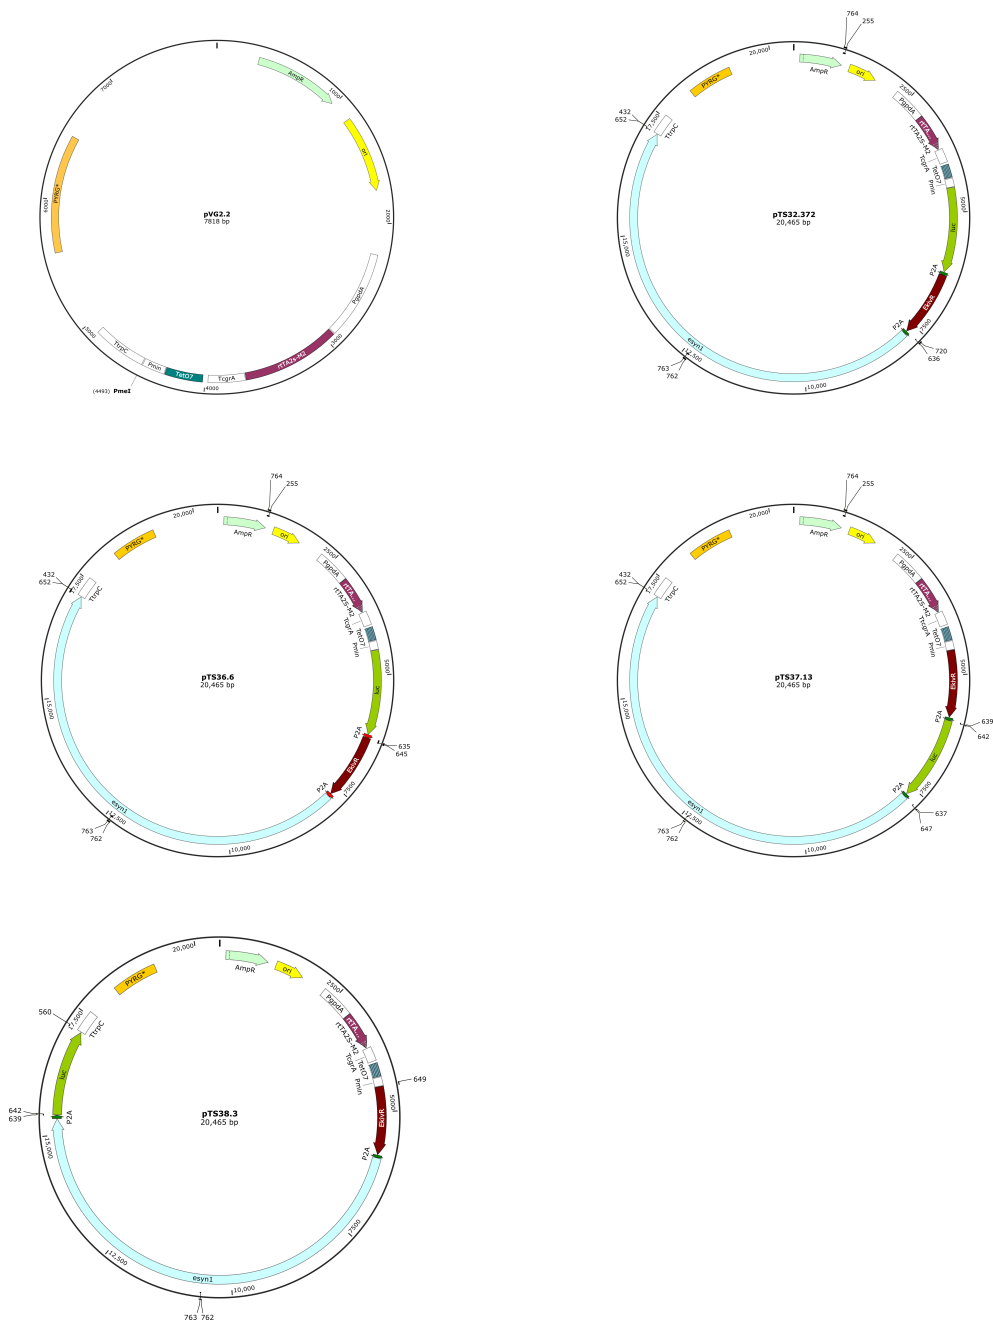

Figure 1: Plasmid maps of assembled plasmids and the entry vector pVG2.2 highlighting the restriction site PmeI. The primers used for the final assembly of the building blocks are shown. Plasmid maps were generated using SnapGene Viewer and modified with Inkscape.

## 4 Southern Analyses

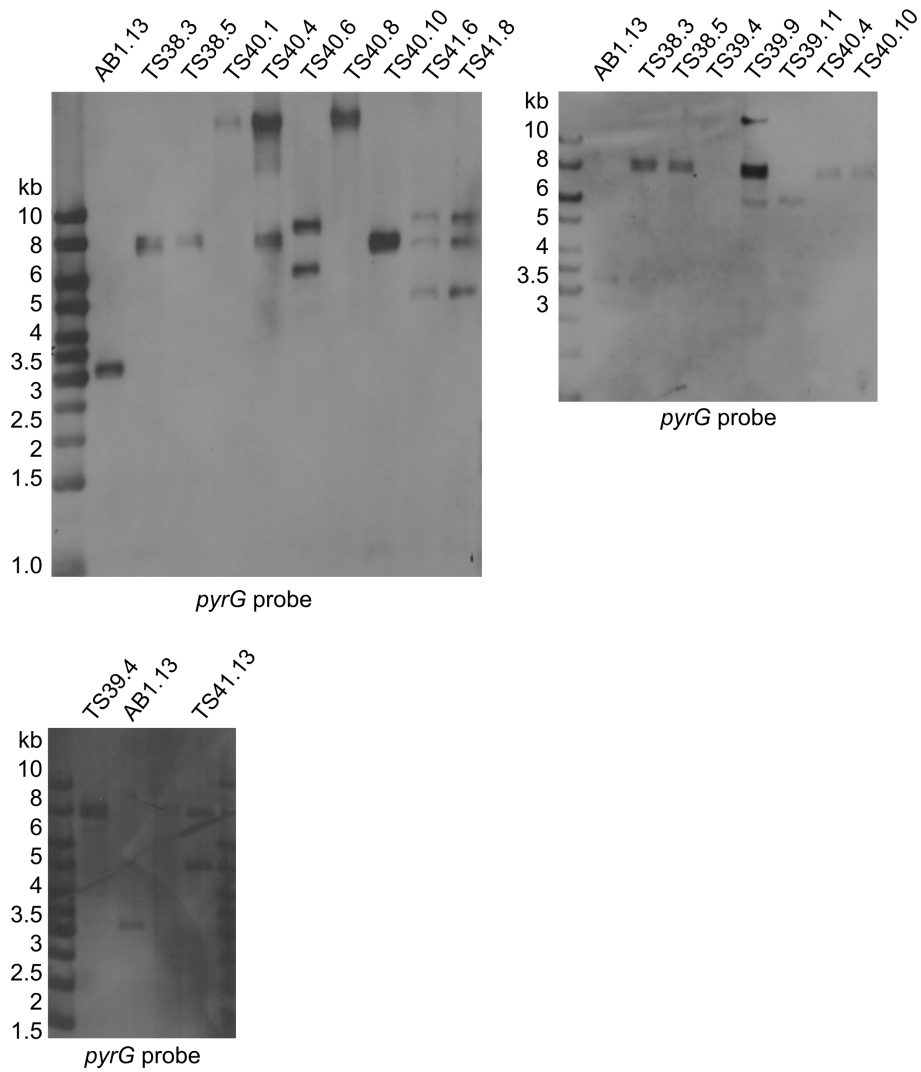

Figure 2: Southern analysis of strains polycistronically expressing luciferase, ketoisovalerate reductase and enniatin synthetase. Using the *pyrG* probe and *Nco*I for restriction, the recipient strain will give a signal at 3.1 kb. The strains TS38, TS39, and TS40 will give a signal at 7.7 and 8.1 kb in case of single integration, for tandem integration an additional 12.7 kb signal. For strain TS41 a signal at 7.7 and 5 kb is expected in case of single integration, for tandem integration an additional signal at 9.6 kb.
